# Supplementary material
Source: PubMed Central journal article supplement (PMC5852381)

## SUPPORTING INFORMATION

### Novel Carbazole Inhibits Phospho-STAT3 Through Induction of Protein Tyrosine Phosphatase PTPN6

Shujie Hou, Yong Weon Yi, Hyo Jin Kang, Li Zhang, Hee Jeong Kim, Yali Kong, Yong Liu, Kan Wang, Hye-Sik Kong, Scott Grindrod, Insoo Bae, Milton L. Brown

#### Contents

|                                            |     |
|--------------------------------------------|-----|
| Compound <b>3</b> <sup>1</sup> H NMR       | S2  |
| Compound <b>3</b> <sup>13</sup> C NMR      | S3  |
| Compound <b>4</b> <sup>1</sup> H NMR       | S4  |
| Compound <b>4</b> <sup>13</sup> C NMR      | S5  |
| Compound <b>5</b> <sup>1</sup> H NMR       | S6  |
| Compound <b>5</b> <sup>13</sup> C(APT) NMR | S7  |
| Compound <b>6</b> <sup>1</sup> H NMR       | S8  |
| Compound <b>12</b> <sup>1</sup> H NMR      | S9  |
| Compound <b>12</b> <sup>13</sup> C NMR     | S10 |
| Compound <b>13</b> <sup>1</sup> H NMR      | S11 |
| Compound <b>13</b> <sup>13</sup> C NMR     | S12 |
| Compound <b>12</b> HPLC purity analysis    | S13 |
| Compound <b>13</b> HPLC purity analysis    | S14 |

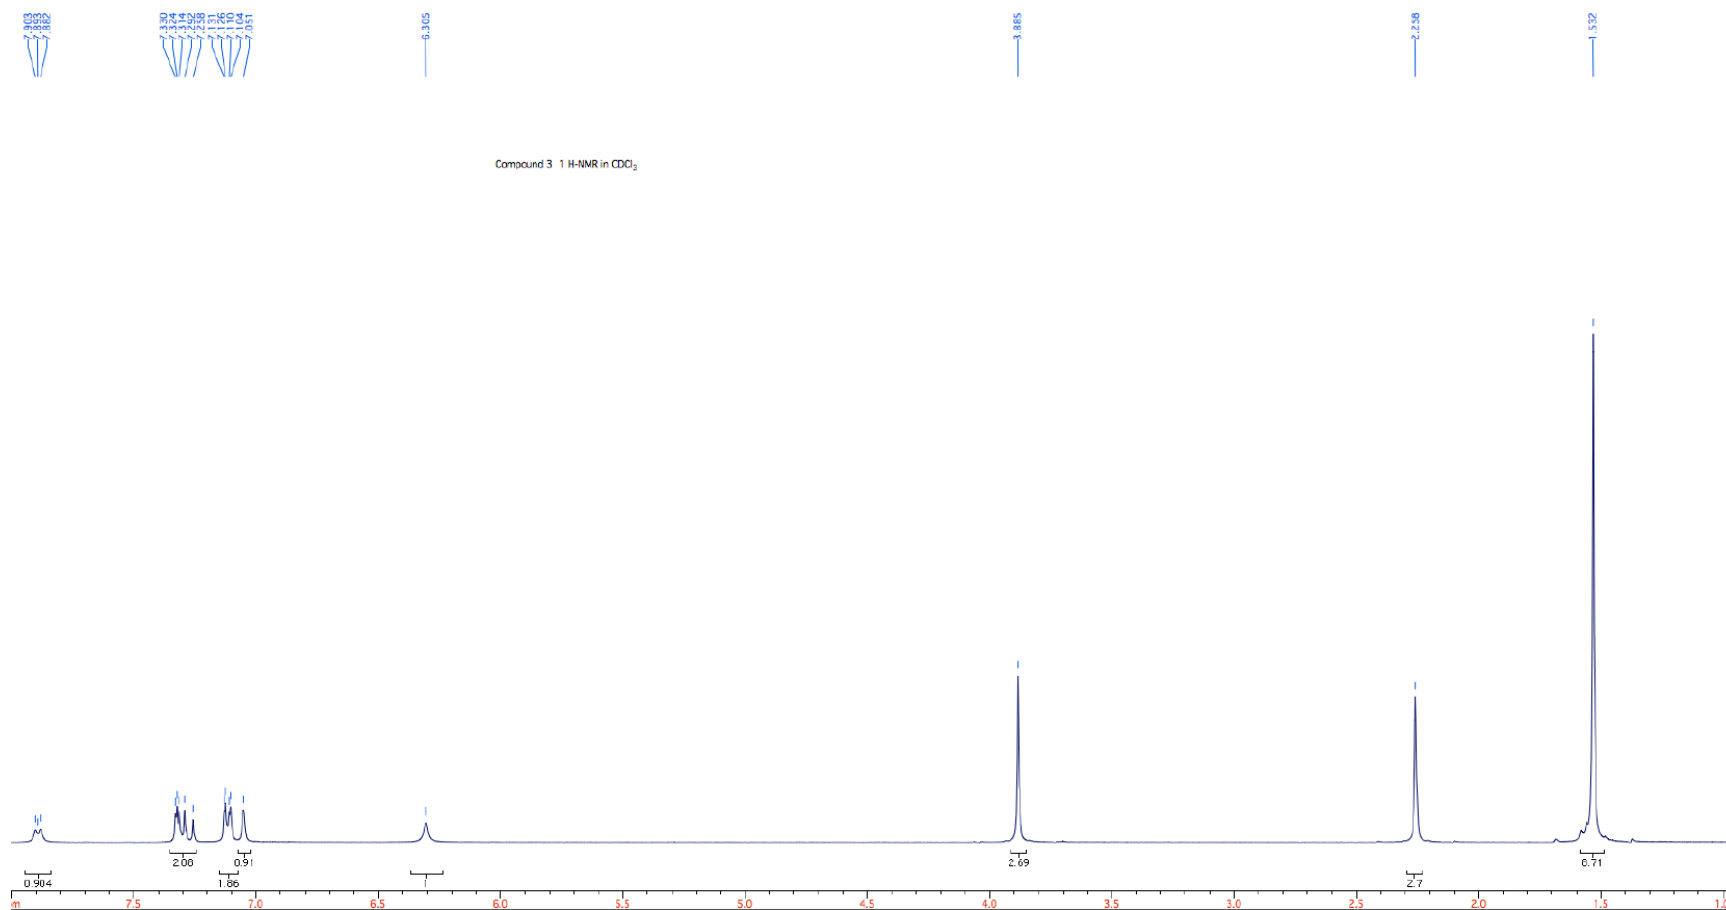

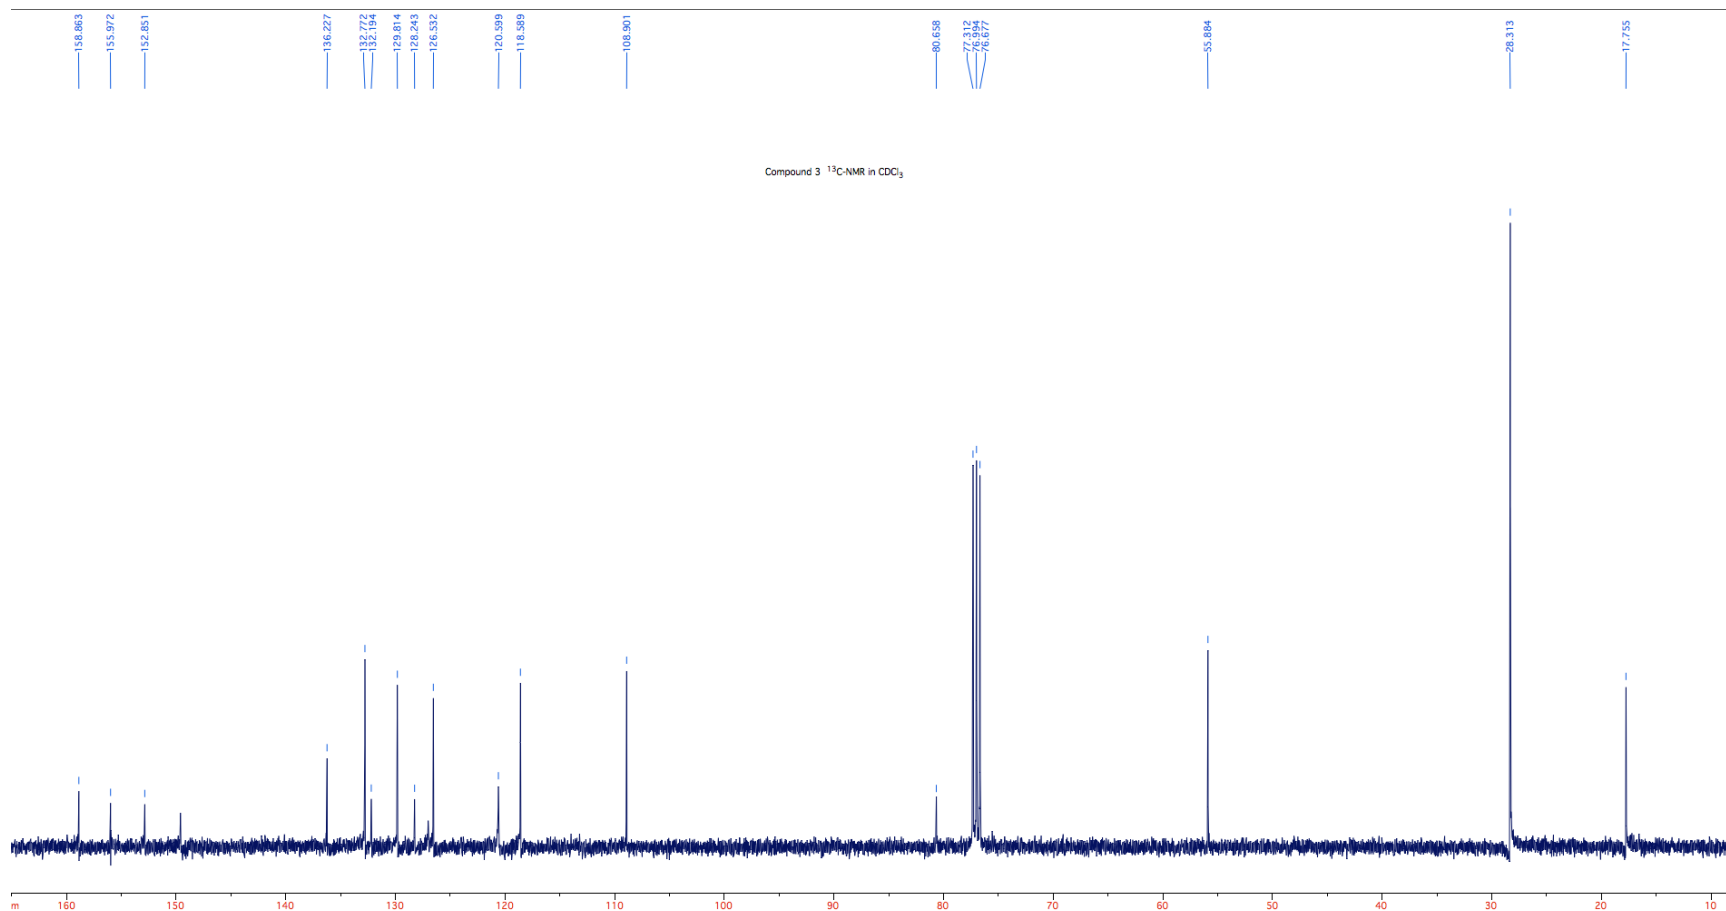

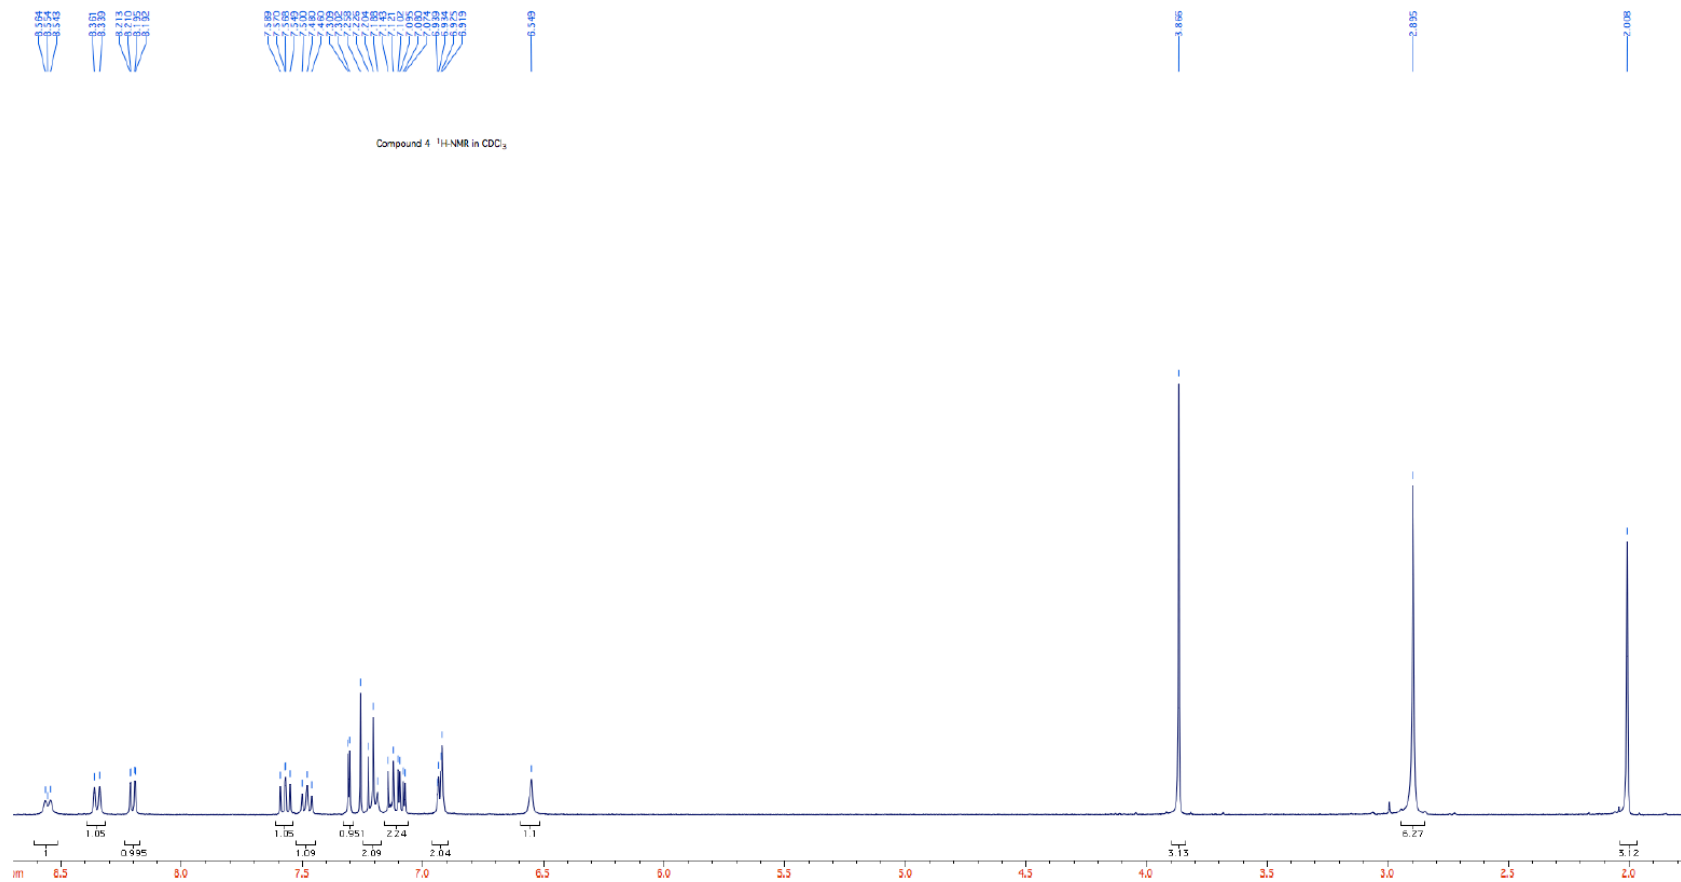

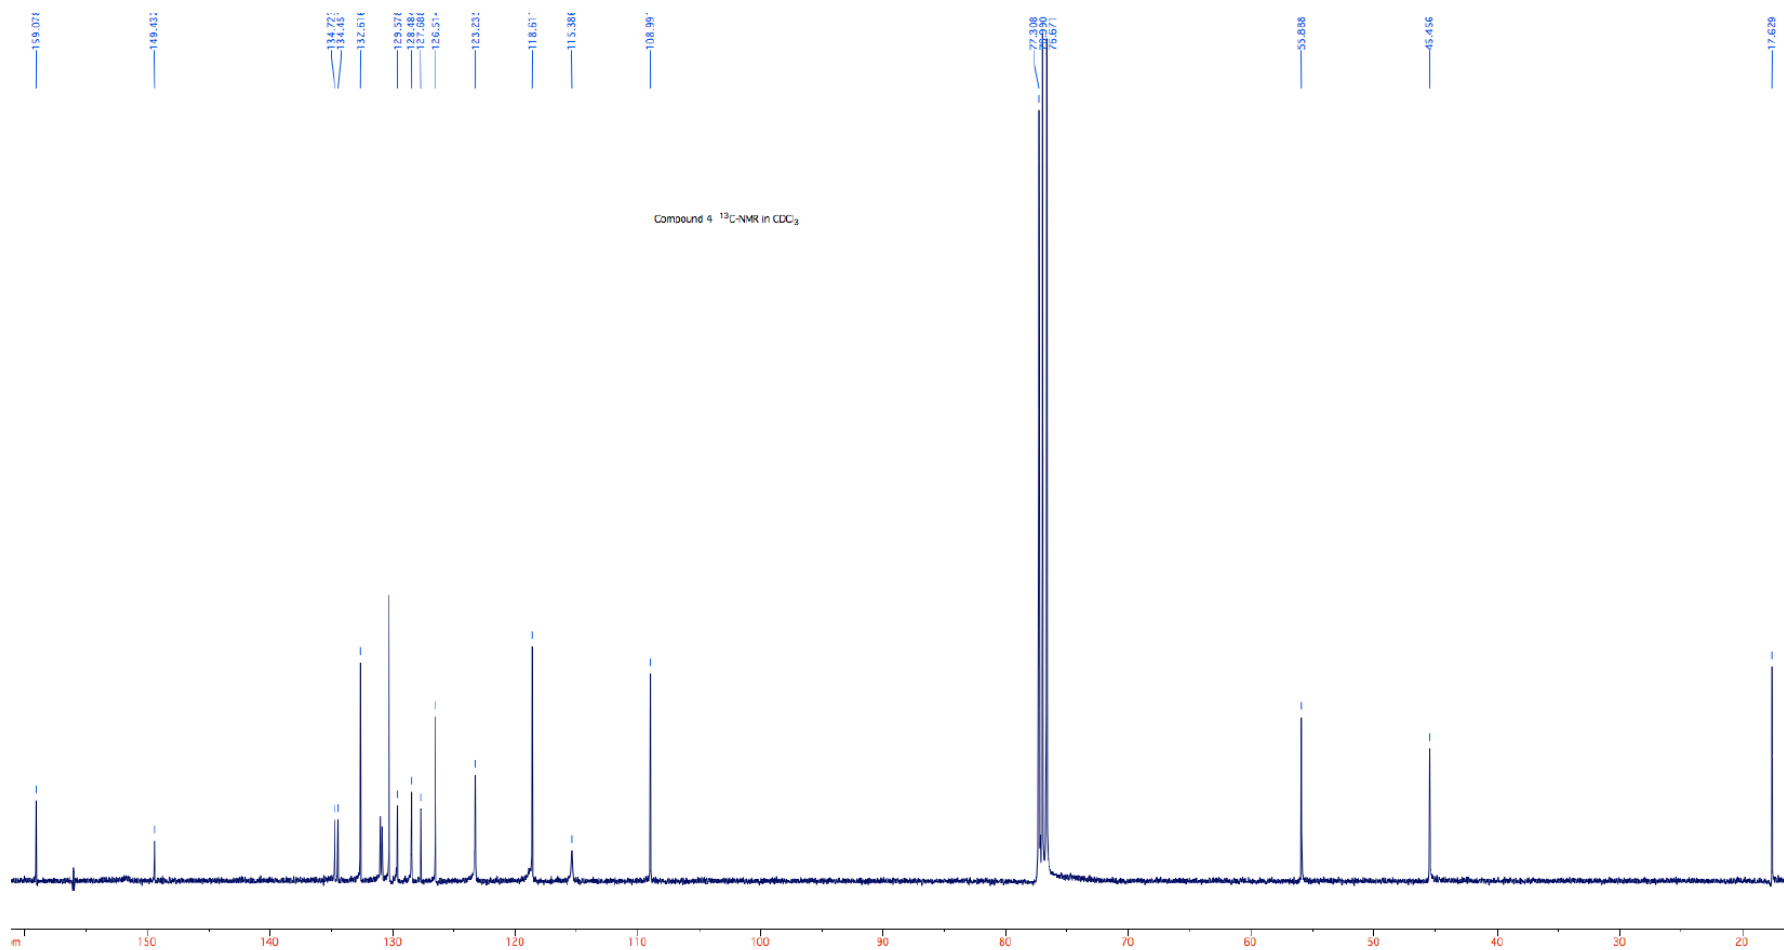

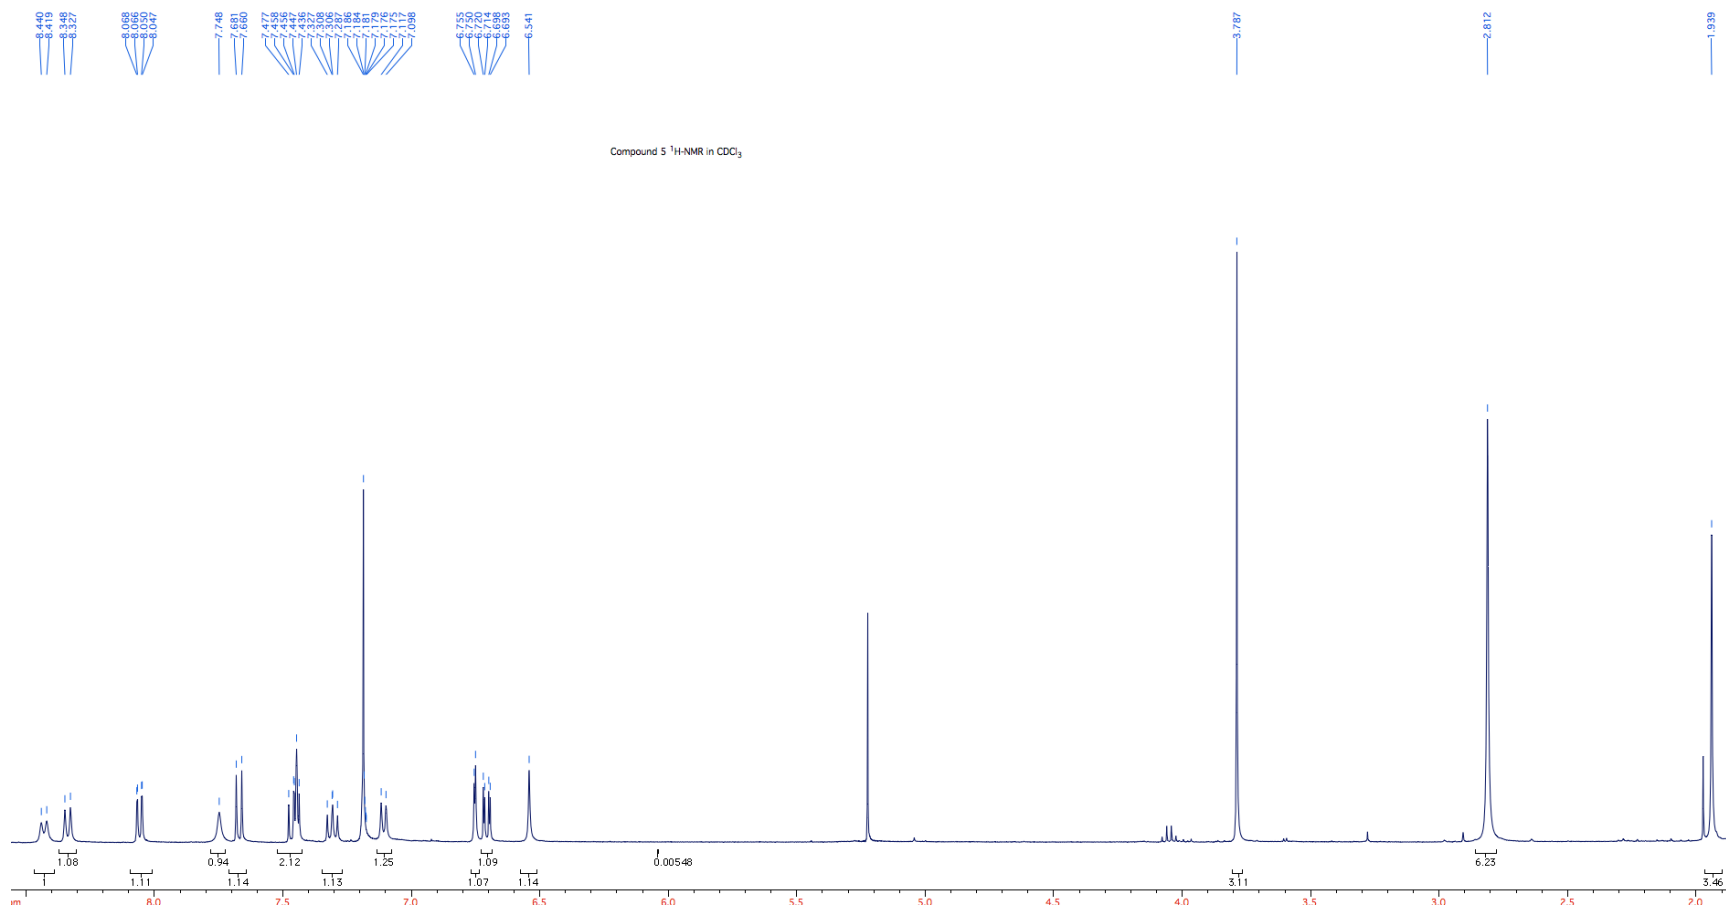

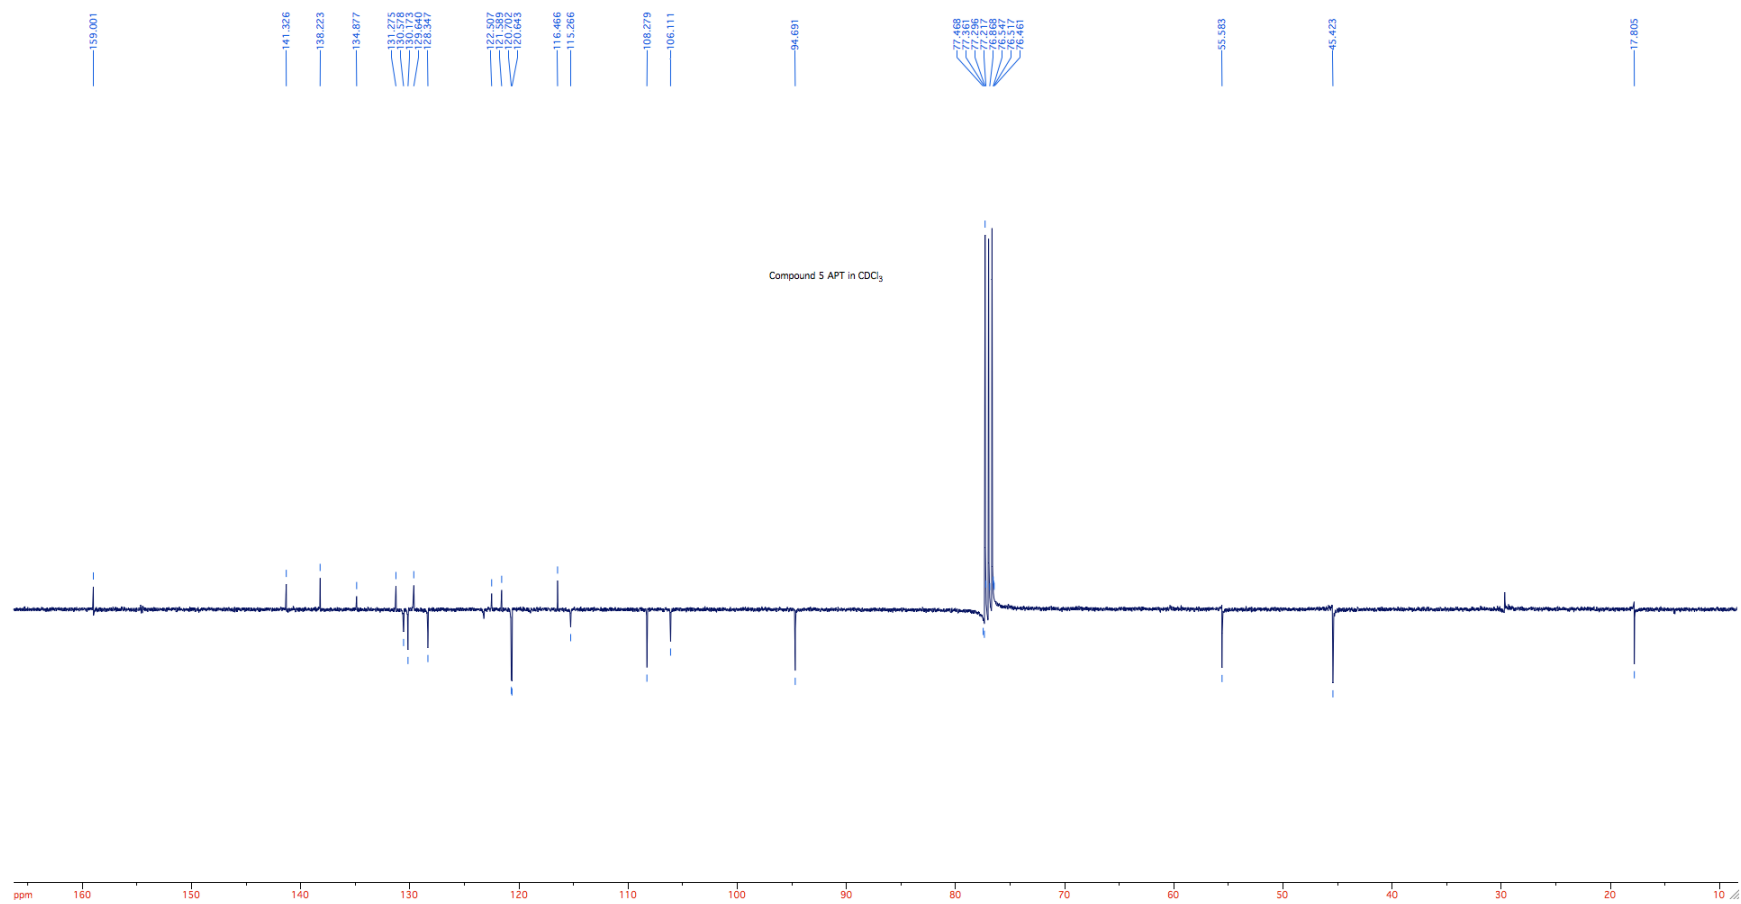

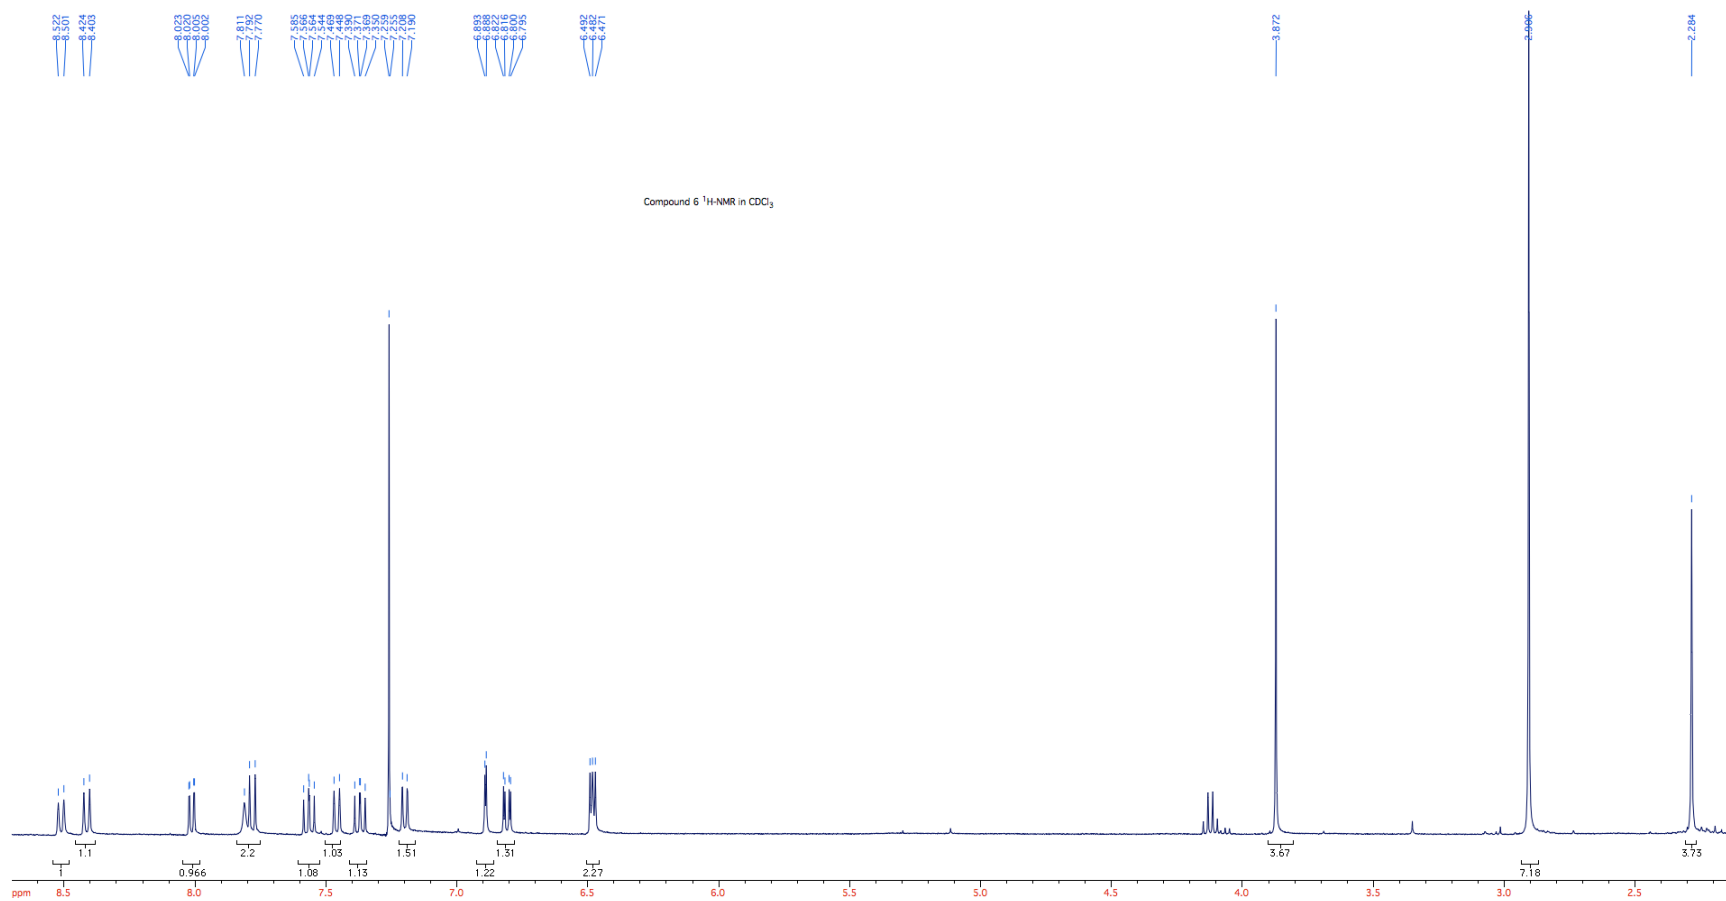



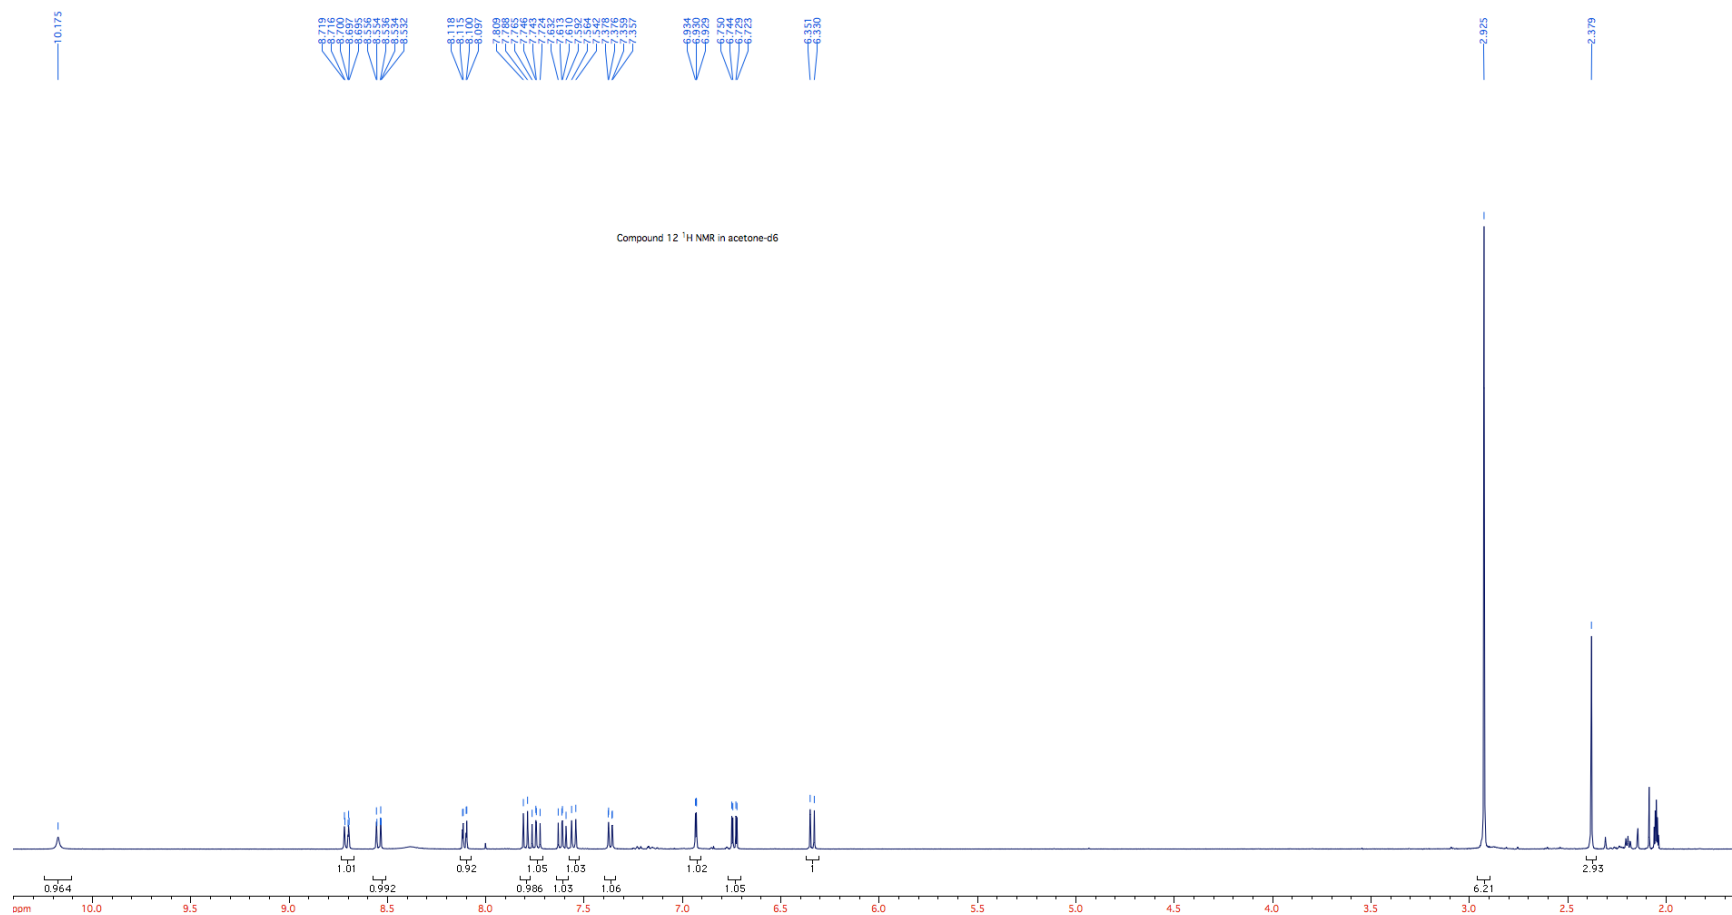

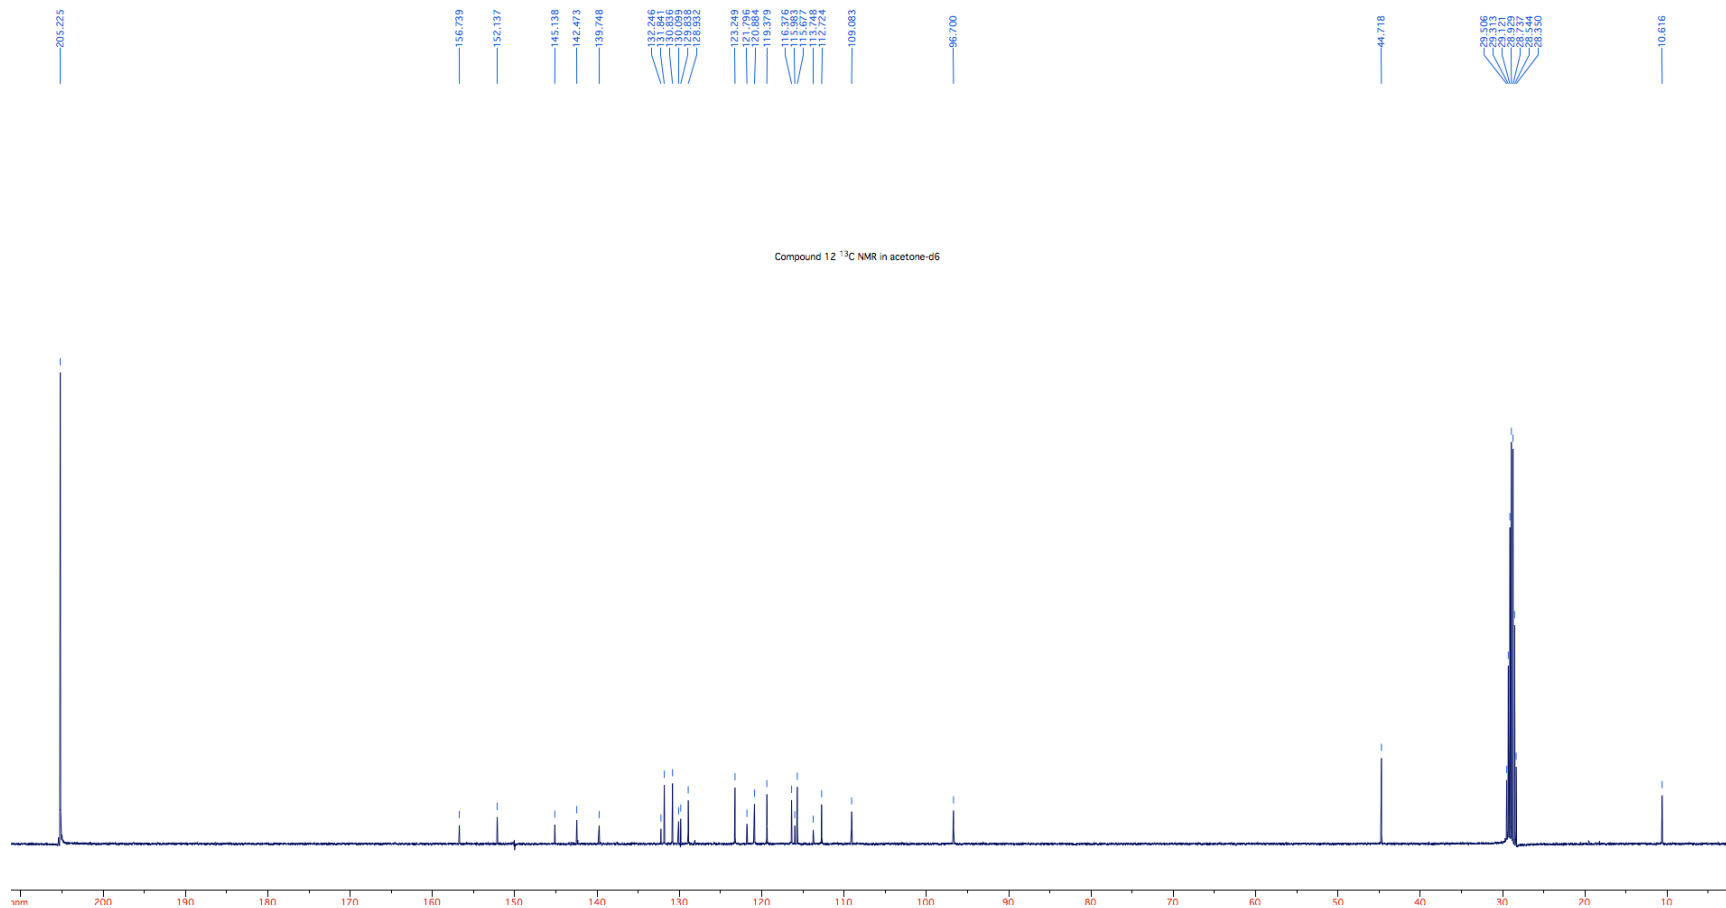

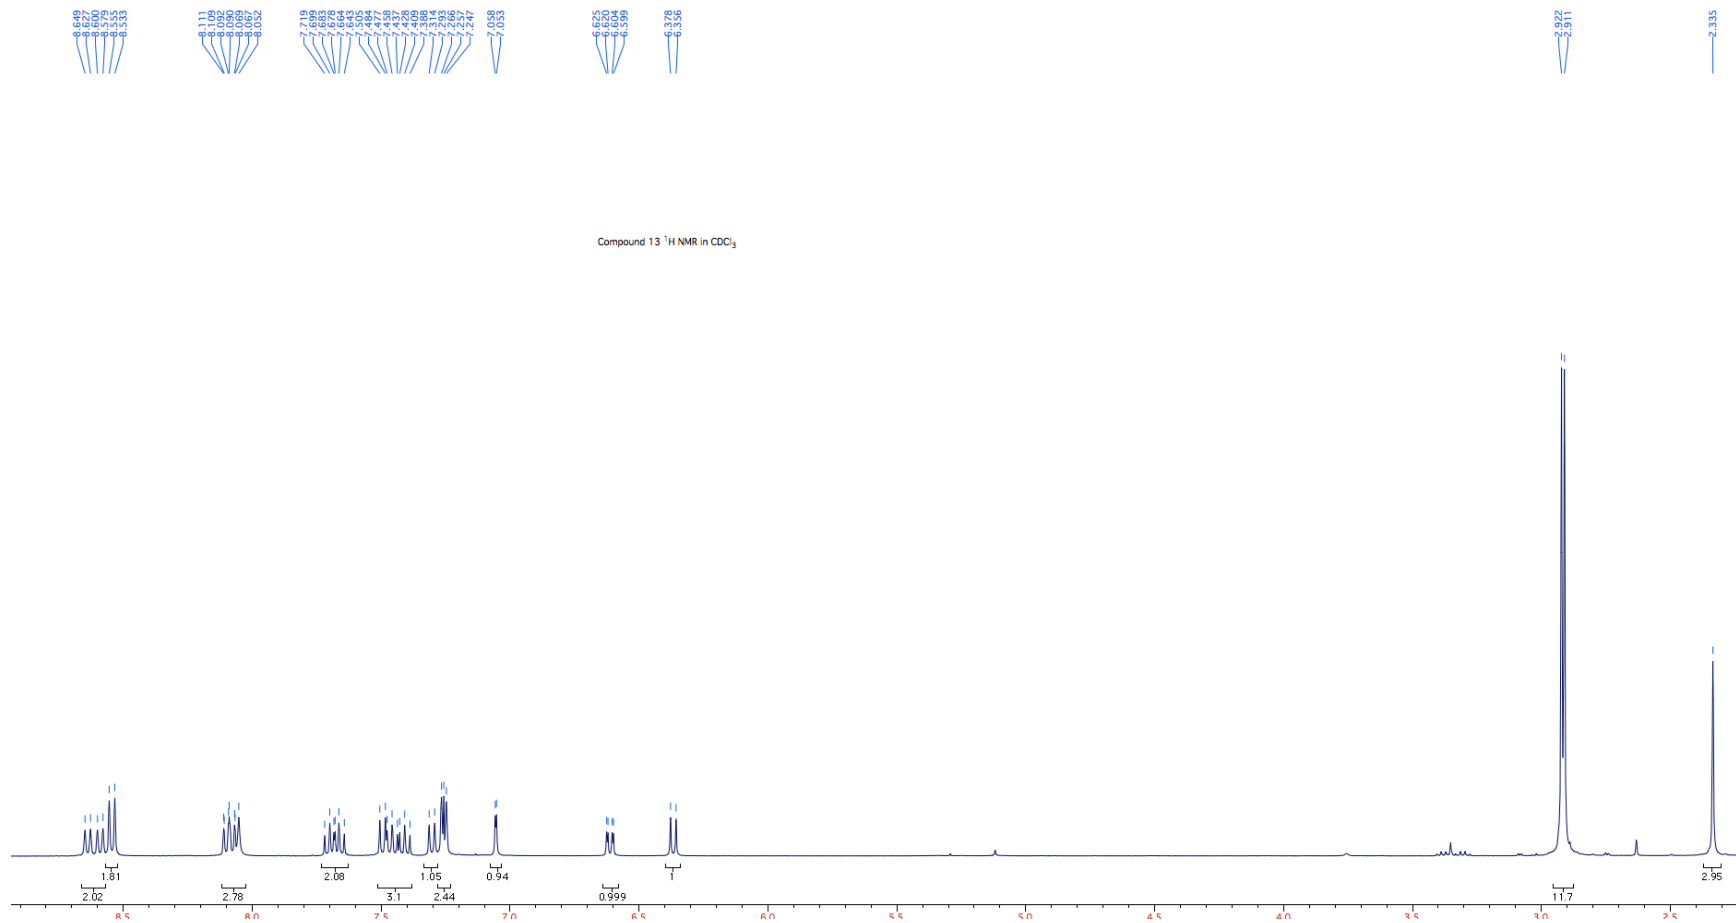

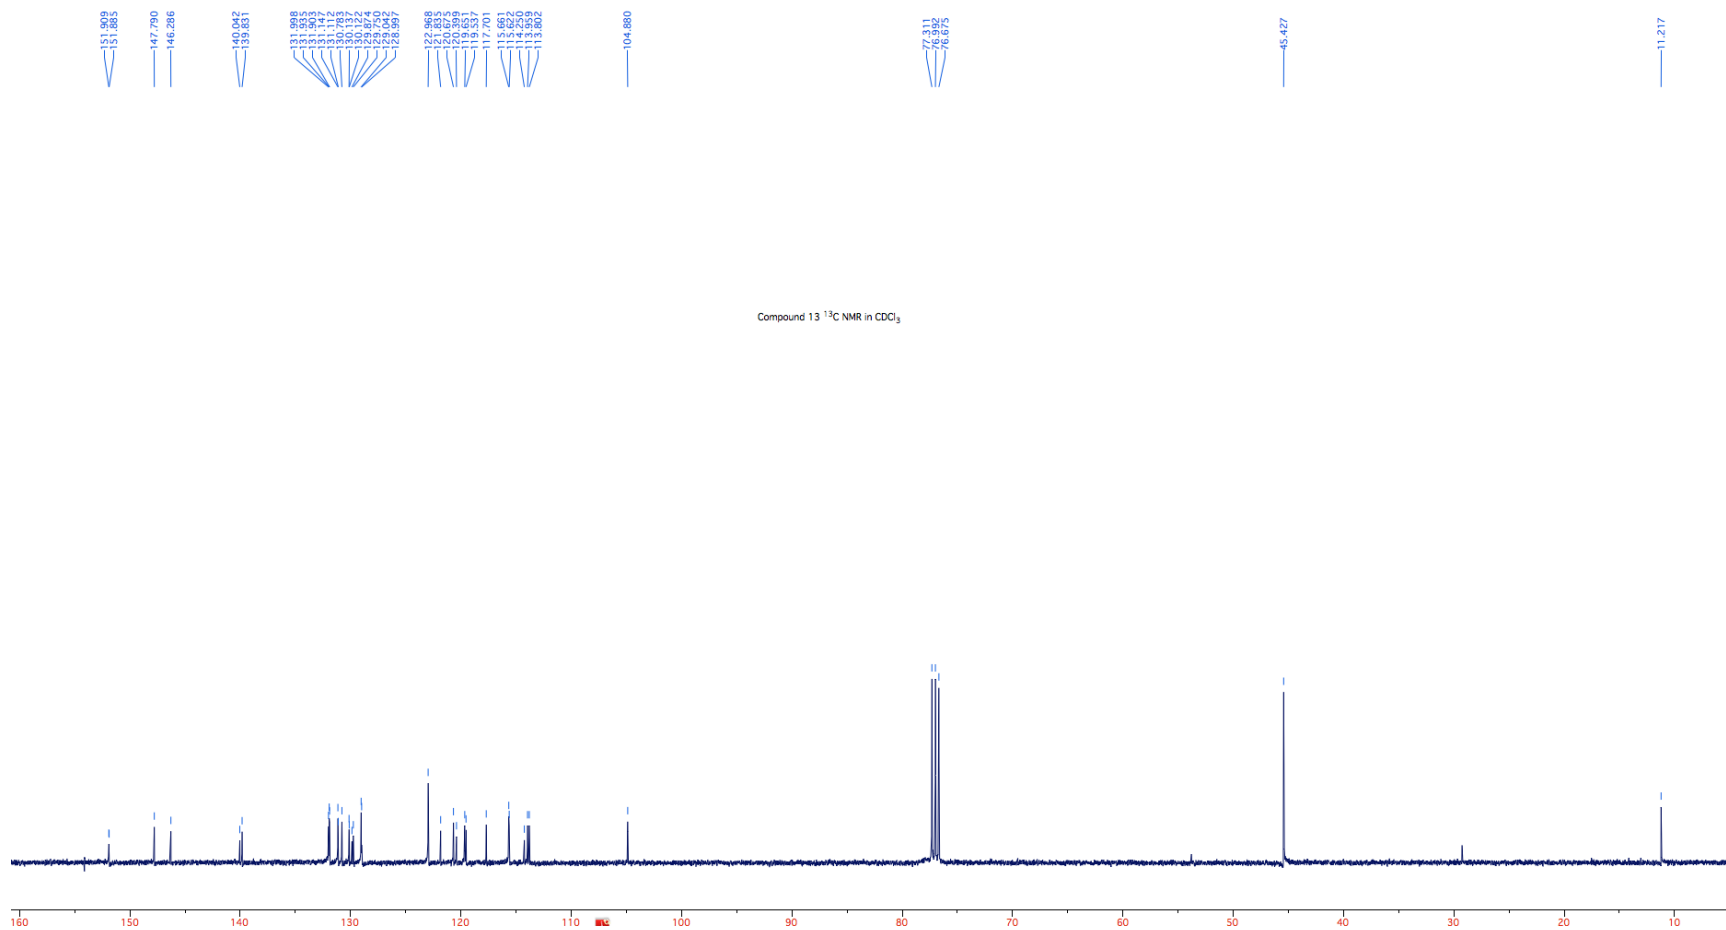

Mobile phase :  
H2O (0.1 % Acetic acid) : Acetonitrile = 20 : 80  
Retention Time : 4.7 min  
Flow rate : 1.0 ml/min  
UV 254 nm

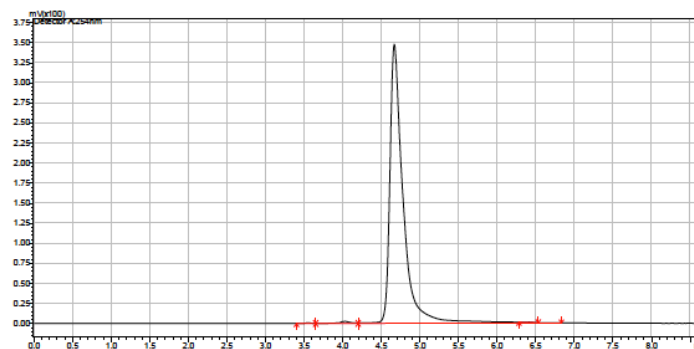

Purity 97.69 %

Mobile phase :  
H2O (0.1 % Acetic acid) : Acetonitrile = 30 : 70  
Retention Time : 9.0 min  
Flow rate : 1.0 ml/min  
UV 254 nm

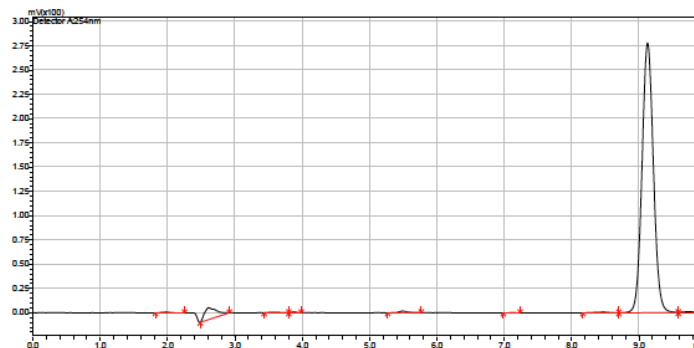

Mobile phase :

H<sub>2</sub>O (0.1 % Acetic acid) : Acetonitrile = 10 : 90

Retention Time : 5.1 min

Flow rate : 1.0 ml/min

UV 254 nm

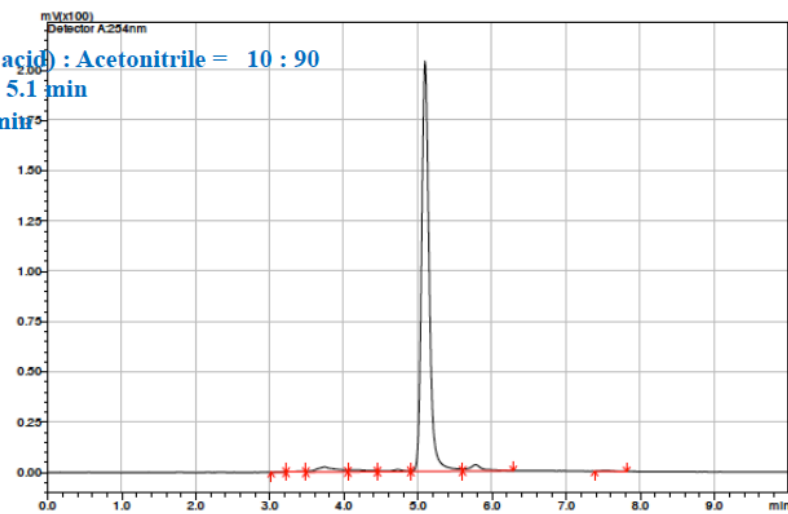

Purity >95 %

### Purity analysis of Compound 13

Mobile phase :

H<sub>2</sub>O (0.1 % Acetic acid) : Acetonitrile = 30 : 70

Retention Time : 6.4 min

Flow rate : 1.0 ml/min

UV 254 nm

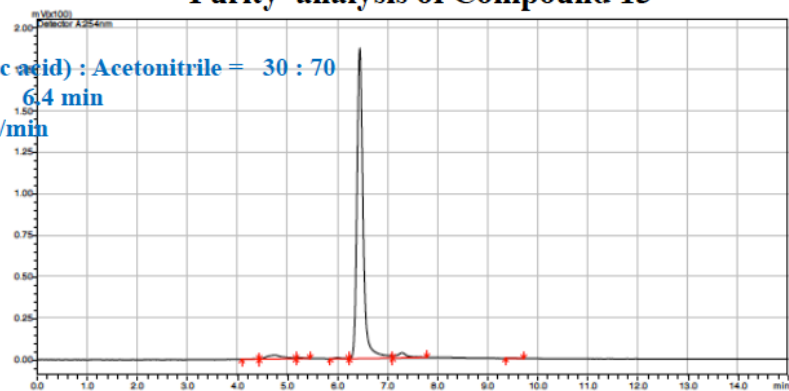

Supplement: NIHMS804481-supplement-Novel_Supp.pdf [file NIHMS804481-supplement-Novel_Supp.pdf]
